# Supplementary material for: Precisely designed layered silicate as an effective and highly selective CO2 adsorbent
Source: Royal Society of Chemistry journal article supplement (doi:10.1039/c3cc44516j), 2013-01-01
Supplement: c3cc44516j.pdf [file c3cc44516j.pdf]

## Electronic supplementary information (ESI) for: Precisely designed layered silicate as an effective and highly selective CO<sub>2</sub> adsorbent

Yusuke Ide,<sup>\*a</sup> Noriko Kagawa,<sup>b</sup> Masahiro Sadakane<sup>b</sup> and Tsuneji Sano<sup>b</sup>

<sup>a</sup>World Premier International (WPI) Research Center, International Center for Materials Nanoarchitectonics (MANA),  
National Institute for Materials Science (NIMS), 1-1 Namiki, Tsukuba 305-0044, Japan. Tel: +81-29-860-4826; E-mail:  
IDE.Yusuke@nims.go.jp

<sup>b</sup>Graduate School of Engineering, Department of Applied Chemistry, Hiroshima University, 1-4-1 Kagamiyama,  
Higashi-Hiroshima, 739-8527, Japan.

### Experimental details

NH<sub>2</sub>-C<sub>18</sub>-mag was synthesized by the reaction of C<sub>12</sub><sup>+</sup>-mag with octadecyltrichlorosilane (ODS) and 3-(aminopropyl)trimethoxysilane (APS). 1.0 g of C<sub>12</sub><sup>+</sup>-mag, prepared according to the reported method,<sup>23</sup> was mixed with a solution of ODS (0.305 mL) in dehydrated toluene (80 mL) at 333 K for 3 days. After the evaporation of the solvent, the solid was mixed with a solution of APS (10 g) in toluene (50 mL) and the mixture was refluxed for 2 days. The product was separated by centrifugation, washed with toluene, a toluene/ethanol mixture, and ethanol, sequentially, and finally dried at 333 K. NH<sub>2</sub>-mag was synthesized by the method similar to that conducted for the synthesis of NH<sub>2</sub>-C<sub>18</sub>-mag; 1.0 g of C<sub>12</sub><sup>+</sup>-mag was refluxed in a solution of APS (10 g) in toluene (50 mL). NH<sub>2</sub>-SBA and Au@CeO<sub>2</sub> was prepared by the method reported in our previous literature.<sup>7</sup> Magadiite modified only with ODS (named C<sub>18</sub>-mag) was also synthesized by the similar way.

Gas adsorption was performed by a BELSORP-mini II (BEL, Japan). Before the adsorption, the sample was heated at 120 °C in vacuo for 3 h.

Photocatalytic oxidations were done as follows. Catalyst (30 mg) and an O<sub>2</sub>-saturated aqueous solution (25 mL) of formic acid (244 ppm) were added into a stainless-made closed container (50 mL) equipped with Pyrex glass window. The CO<sub>2</sub> adsorbent (50 mg) was placed in the gas phase of the reactor. The mixture was irradiated by a solar simulator (San-Ei Electric Co., Ltd., Japan) at 315 K, under magnetic stirring. After the removal of the catalyst by filtration, the amount of formic acid remained in the supernatant was determined by HPLC. The photocatalysis under a CO<sub>2</sub> atmosphere was conducted by adding dry ice into the starting mixture.

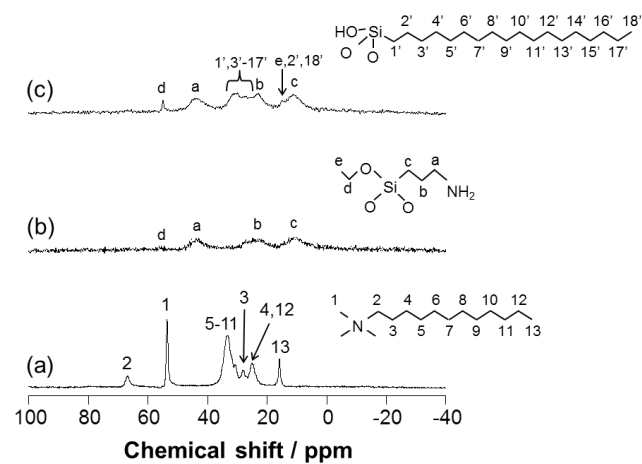

**Fig. S1**  $^{13}\text{C}$  CP/MAS NMR spectra of (a)  $\text{C}_{12}^+$ -mag, (b)  $\text{NH}_2$ -mag, and (c)  $\text{NH}_2$ - $\text{C}_{18}$ -mag.

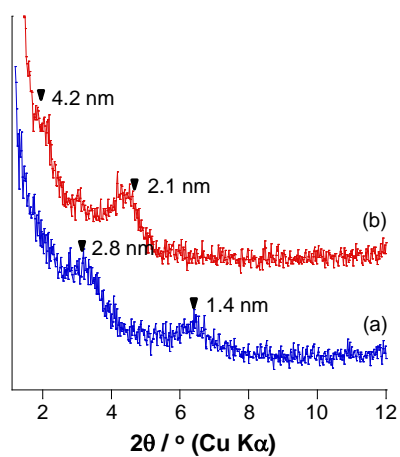

**Fig. S2** XRD patterns of (a)  $\text{NH}_2\text{-C}_{18}\text{-mag}$  and (b)  $\text{NH}_2\text{-mag}$  after mixing with liquid  $\text{H}_2\text{O}$ .

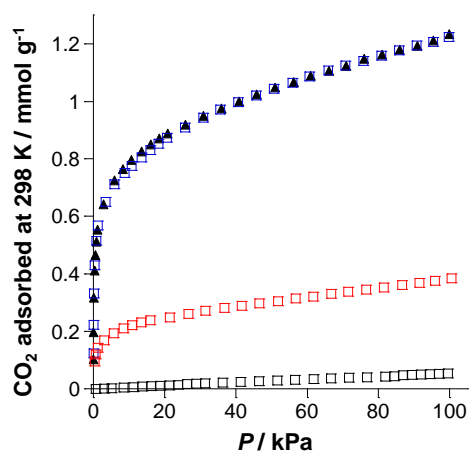

**Fig. S3** CO<sub>2</sub> adsorption isotherms measured at 298 K of (◻) C<sub>18</sub>-mag (the amount of the grafted octadecyl group is 1.8 groups per Si<sub>14</sub>O<sub>29</sub>), (◻) NH<sub>2</sub>-mag, (◻) NH<sub>2</sub>-C<sub>18</sub>-mag and (▲) NH<sub>2</sub>-SBA.
